# Supplementary material for: Diagnostic value of intereye difference metrics for optic neuritis in aquaporin-4 antibody seropositive neuromyelitis optica spectrum disorders
Source: PubMed Central journal article supplement — J Neurol Neurosurg Psychiatry. 2023 Feb 21;94(7):560–6. doi: 10.1136/jnnp-2022-330608 (PMC10314042; doi:10.1136/jnnp-2022-330608), 2023-02-21
Supplement: jnnp-2022-330608supp001.pdf [file jnnp-2022-330608supp001.pdf]

## Supplement

|                        | HC | NMOSD-NON | NMOSD-ON | TOTAL |
|------------------------|----|-----------|----------|-------|
| Berlin, Germany        | 27 | 9         | 4        | 40    |
| Düsseldorf, Germany    | 16 | 4         | 2        | 22    |
| Mangalore, India       | 9  | 6         | 3        | 18    |
| Barcelona, Spain       | 10 | 2         | 1        | 13    |
| Oxford, UK             | .  | 7         | 5        | 12    |
| Milan, Italy           | .  | 7         | 2        | 9     |
| Belo Horizonte, Brazil | .  | 1         | 6        | 7     |
| Munich, Germany        | .  | 3         | 1        | 4     |
| Isfahan, Iran          | .  | 2         | 1        | 3     |
| Lyon, France           | .  | 1         | 1        | 2     |
| Odense, Denmark        | .  | 1         | 2        | 3     |
| Liverpool, UK          | .  | 1         | .        | 1     |
| Michigan, US           | .  | 1         | .        | 1     |

**Supplementary table 1:** Contributing centers with number of patients per study cohort. *Abbreviation:* HC, healthy controls; MS-ON, patients with multiple sclerosis and a history of unilateral ON; N, number; NMOSD-ON, patients with aquaporin-4-antibody seropositive neuromyelitis optica spectrum disorders and a history of unilateral optic neuritis; NMOSD-NON, patients with aquaporin-4-antibody seropositive neuromyelitis optica spectrum disorders and no history of optic neuritis.
